# Supplementary material for: Tetraplex Fluorescent Microbead-Based Immunoassay for the Serodiagnosis of Newcastle Disease Virus and Avian Influenza Viruses in Poultry Sera
Source: MDPI journal article supplement (doi:10.3390/pathogens11091059), 2022-09-17
Supplement: s1 [file s1]

## Supplemental materials

**Table S1.** Positive and negative control sera for assay validation.

| Serum                              | HI                        |              |              | Commercial ELISA |                  |              |              | Western Blotting |            |              |              |
|------------------------------------|---------------------------|--------------|--------------|------------------|------------------|--------------|--------------|------------------|------------|--------------|--------------|
|                                    | NDV<br>clone 30           | AIV<br>H5N3  | AIV<br>H7N7  | IDEXX<br>NDV NP  | iD.Vet<br>AIV NP | iD.Vet<br>H5 | iD.Vet<br>H7 | NDV<br>rNP       | IAV<br>rNP | H5N3<br>rHA1 | H7N7<br>rHA1 |
| S82 (H5N1 <sup>a</sup> )           | 4                         | > <b>512</b> | 4            | neg.             | <b>pos.</b>      | <b>pos.</b>  | neg.         | -                | +          | +            | -            |
| S304 (H7N3 <sup>a</sup> )          | 2                         | <2           | > <b>512</b> | neg.             | <b>pos.</b>      | neg.         | <b>pos.</b>  | -                | +          | -            | +            |
| S185 (ND-<br>Ulster <sup>1</sup> ) | > <b>512</b> <sup>b</sup> | <2           | <2           | <b>pos.</b>      | neg.             | neg.         | neg.         | +                | -          | -            | -            |
| SPF serum                          | 4                         | <2           | 4            | neg.             | neg.             | neg.         | neg.         | -                | -          | -            | -            |

<sup>a</sup> - Antigen used to raise the sera

<sup>b</sup> - Bold-face values indicate specifically positive reactions. Western blotting reactions are also depicted in Figure 2.

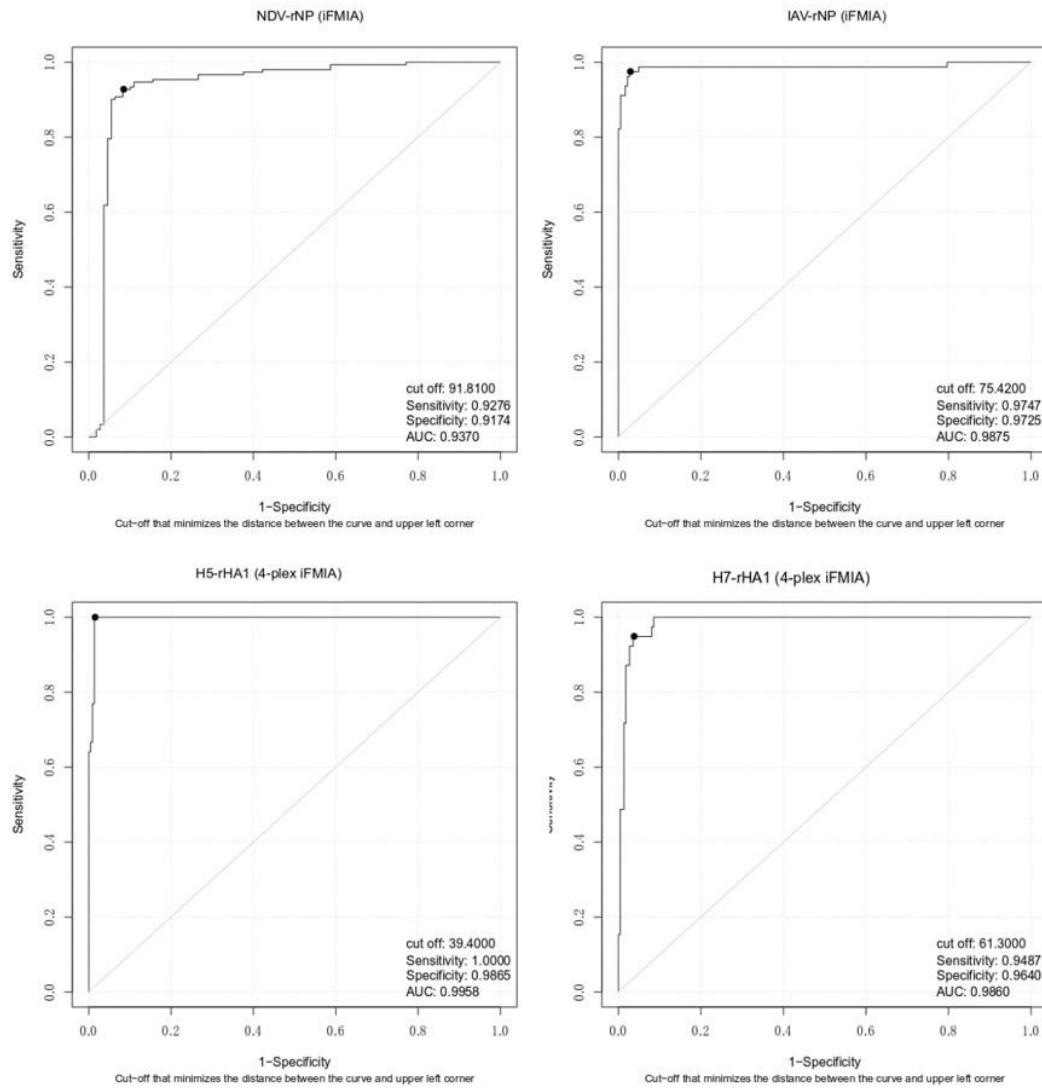

**Figure S1.** ROC analyses of the 4plex iFMA for performance characteristics in sera from experimentally infected and/or vaccinated galliform poultry. ROC curves of the 4plex iFMA reactivity to 4 recombinant proteins of NDV and AIV were compared with those of HI assay (n = 257).
